# Supplementary material for: Camel (Camelus spp.) Urine Bioactivity and Metabolome: A Systematic Review of Knowledge Gaps, Advances, and Directions for Future Research
Source: MDPI journal article supplement (doi:10.3390/ijms232315024), 2022-11-30
Supplement: s1 [file s1]

**Table S1.** Results of Shapiro-Francia W' test with Box–Cox transformation.

| Variable                                     | Camel urine bioactivity |         |       |         |         | Camel urine metabolome |         |       |        |         |
|----------------------------------------------|-------------------------|---------|-------|---------|---------|------------------------|---------|-------|--------|---------|
|                                              | Obs (n)                 | W'      | V'    | Z'      | p-value | Obs (n)                | W'      | V'    | Z'     | p-value |
| Journal                                      | 12                      | 0.98190 | 0.337 | -1.721  | 0.95741 | 8                      | 0.98973 | 0.152 | -2.442 | 0.99269 |
| Year of publication                          | 12                      | 0.81277 | 3.489 | 2.204   | 0.01375 | 8                      | 0.49848 | 7.439 | 3.778  | 0.00008 |
| JCR Impact Factor per paper publication year | 12                      | 0.97777 | 0.414 | -1.409  | 0.92055 | 8                      | 0.79316 | 3.068 | 1.931  | 0.02674 |
| Total number of citations per paper          | 12                      | 0.83163 | 3.138 | 2.007   | 0.02238 | 8                      | 0.76844 | 3.435 | 2.149  | 0.01580 |
| Number of authors                            | 12                      | 0.93720 | 1.170 | 0.264   | 0.39595 | 8                      | 0.99717 | 0.042 | -3.673 | 0.99988 |
| Country of corresponding author              | 12                      | 0.96672 | 0.620 | -0.778  | 0.78172 | 8                      | 0.99487 | 0.076 | -3.143 | 0.99917 |
| Camel species                                | 12                      | 1.00000 | 0.000 | -17.144 | 1.00000 | 8                      | 0.99411 | 0.087 | -3.011 | 0.99870 |
| Camel breeding location                      | 12                      | 0.96558 | 0.641 | -0.724  | 0.76554 | 8                      | 0.98046 | 0.290 | -1.704 | 0.95581 |
| Sample size                                  | 5                       | 0.87289 | 1.583 | 0.660   | 0.25457 | 4                      | 0.0     | 0.0   | 0.0    | 0.0     |
| Sex of sampled animals                       | 12                      | 1.00000 | 0.000 | -18.128 | 1.00000 | 8                      | 1.0000  | 0.000 | -8.088 | 1.0000  |
| Mean age of sampled animals (years)          | 5                       | 1.0000  | 0.000 | 0.0     | 0.00001 | 2                      | 0.0     | 0.0   | 0.0    | 0.0     |
| Physiologic al status of sampled animals     | 12                      | 0.99741 | 0.048 | -4.404  | 0.99999 | 8                      | 0.97918 | 0.309 | -1.626 | 0.94802 |

A p-value less than 0.05 was considered statistically significant.

The W' value is the Shapiro–Francia test statistics. It is also reported the value V', which are more appealing indexes for departure from normality. The median values of V' are 1 for normal distributed samples, while

larger values mean nonnormality. The 95% critical values of this last statistics depend on the sample size and range between 1.2 and 2.4 (2.0 and 2.8); see Royston [1]. As one is just the transform of the other, neither  $V'$  nor  $W'$  contain different information from each other. The normal approximation to the sampling distribution of  $W'$  was done under the Box–Cox transformation, which is valid for  $5 \leq n \leq 1000$ .

1. Royston, P. Estimating departure from normality. *Stat. Med.* 1991, 10, 1283-1293.
