# Supplementary material for: Camel (Camelus spp.) Urine Bioactivity and Metabolome: A Systematic Review of Knowledge Gaps, Advances, and Directions for Future Research
Source: Int J Mol Sci. 2022 Nov 30;23(23):15024. doi: 10.3390/ijms232315024 (PMC9740287; doi:10.3390/ijms232315024)
Supplement: Supplementary file 1 [file ijms-23-15024-s001.zip › Supplementary Table S2.xlsx]

## Sheet: List of chemicals reported
IUPAC Name (CAS)	Alias	Link PUBCHEM	Origin/source	Uses	Structure	Molecular formula	Formula weight (nominal)	cLogPa	Ro5b	Veber rulec	Ghose filterd	MDDR rulee	Ro3f	Fsp3,g	Chirality
2-methylbutanedioic acid (498-21-5)	2-Methylsuccinic acid, Methylsuccinic acid, Pyrotartaric acid, 1,2-Propanedicarboxylic acid, Butanedioic acid, 2-methyl, Methylbutanedioic acid, Methylsuccinate, Pyrotartarate, Methylbutanedioate	https://pubchem.ncbi.nlm.nih.gov/compound/10349	It is a recurring component of urban aerosols and animal fluids.	Pressure-sensitive adhesive, adhesive sheet and laminate.		C5H8O4	132	-0.24	Yes	Yes	No	No	No	Yes	Yes
propanedioic acid (141-82-2)	Malonic acid, Dicarboxymethane, Carboxyacetic acid, Methanedicarboxylic acid, Methanedicarbonic acid, Propane-1,3-dioic acid, alpha,omega-Dicarboxylic acid, 1,3-Propanedioic acid, Malonate	https://pubchem.ncbi.nlm.nih.gov/compound/867	Is a naturally occurring substance found in many fruits and vegetables. There is a suggestion that citrus fruits produced in organic farming contain higher levels of malonic acid than fruits produced in conventional agriculture.	Food additive, cosmetics, coatings industry, control of acidity, surgical adhesive.		C3H4O4	104	-0.56	Yes	Yes	No	No	No	Yes	No
2-aminopropanedioic acid (1068-84-4)	Aminomalonic acid, Aminomalonate, 2-Aminopropanedioic Acid, 2-Aminomalonic acid, alpha-Aminomalonic acid, Aminopropanedioate, amino-Malonic acid, a-Aminomalonic acid	https://pubchem.ncbi.nlm.nih.gov/compound/100714	It is malonic acid in which one of the methylene hydrogens has been replaced by an amino group. It has a role as a human metabolite and a Daphnia magna metabolite. Constituent of proteins before the hydrolysis procedure. Possible origins of Ama include errors in protein synthesis and oxidative damage to amino acid residues in proteins.	Treating cancer with anti-CD38 immunotherapy, anti-cd38 immunotherapy, anti-CD19/CD22 immunotherapy.		C3H4NO4	119	-0.27	Yes	Yes	No	No	No	Yes	Yes
(2S,3R)-butane-1,2,3,4-tetrol (149-32-6)	Erytritol, meso-Erythritol, (2R,3S)-butane-1,2,3,4-tetrol, erythro-tetritol, (2R,3S)-rel-Mesoerythritol, Erythrite, L-Erythritol, meso-1,2,3,4-Tetrahydroxybutane, Butanetetrol, 1,2,3,4-Butanetetrol, 1,2,3,4-Butanetetraol, Epitope ID:114707	https://pubchem.ncbi.nlm.nih.gov/compound/222285	Erythritol is the meso-diastereomer of butane-1,2,3,4-tetrol. It has a role as an antioxidant, a plant metabolite and a human metabolite. Erythritol is a four-carbon sugar that is found in algae, fungi, and lichens. It is twice as sweet as sucrose and can be used as a coronary vasodilator.	Vasodilator, food additive, cosmetics (humectant, moisturising, anti-inflammation and anti-aging cream), immunity, improvement of sleep quality, umbago, leg pain, and arthralgia and myalgia, plastic surgery.		C4H10O4	122	-0.30	Yes	Yes	No	No	No	Yes	Yes
(2S)-2-amino-4-(diaminomethylideneamino)oxybutanoic acid (543-38-4)	L-2-Amino-4-(guanidinooxy)butyric acid, O-((Aminoiminomethyl)amino)-L-homoserine, L-(+)-Canavanine, O-carbamimidamido-L-homoserine, 2-azaniumyl-4-(diaminomethylideneamino)oxybutanoate, (2S)-2-amino-4-guanidinooxybutanoic acid, (S)-2-Amino-4-(guanidinooxy)butanoic acid, O-{[Amino(imino)methyl]amino}-L-homoserine, (2S)-2-amino-4-(carbamimidamidooxy)butanoic acid, L-Alpha-amino-gamma-[guanidinooxy]-…	https://pubchem.ncbi.nlm.nih.gov/compound/439202	Potentially toxic nonprotein amino acid of certain leguminous plants. Many species are prolific canavanine producers; they divert enormous nitrogen resource to the storage of this single natural product. Canavanine, a highly effective protective allelochemical, provides a formidable chemical barrier to predation and disease. Cytotoxic antimetabolite; substrate for arginyl-tRNA synthetase.	Phytogenic insecticide, potential agent in the treatment of endotoxin shock, anticancer agent, potential SARS-CoV-2 inhibitor.		C5H12N4O3	176	-1.40	Yes	Yes	No	No	No	Yes	Yes
2-amino-3-methyl-4H-imidazol-4-one (60-27-5)	2-Imino-1-methylimidazolidin-4-one, 1-Methylglycocyamidine, 1-Methylhydantoin-2-imide, 2-amino-1-methylimidazolin-4-one, 2-amino-1-methyl-1,5-dihydro-4H-imidazol-4-one, 2-Imino-N-methylhydantoin, Creatine anhydride, 2-Amino-1-methyl-2-imidazolin-4-one, 2-Amino-1,5-dihydro-1-methyl-4H-imidazol-4-one, Creatinine, 2-Imino-1-methyl-4-imidazolidinone, 2-Amino-1-methyl-1,5-dihydroimidazol-4-one, 2-Imin…	https://pubchem.ncbi.nlm.nih.gov/compound/588	Creatinine is a lactam obtained by formal cyclocondensation of creatine. It is a metabolite of creatine. It has a role as a diagnostic agent and a human metabolite. It is a lactam and an imidazolidinone. It derives from a creatine.	Biomarker of lower urinary tract d ysfunction in chronic Chagas' disease, cosmetics (skin conditioning), antiviral and immunomodulatory interferon-beta in high-risk COVID-19 patients, treatment of restless leg syndrome (rls), treating ulcerative colitis, treatment of peptic ulcer and helicobacter pylori infection, treat left ventricular systolic dysfunction in patients undergoing cardiac surgery …		C4H7N3O	113	-1.69	Yes	Yes	No	No	Yes	Yes	No
(3R,4S,5R,6R)-6-(hydroxymethyl)oxane-2,3,4,5-tetrol (59-23-4)	D-Gal, D-Galactopyranose, D-Galactopyranoside, Cerebrose, (3R,4S,5R,6R)-6-(hydroxymethyl)oxane-2,3,4,5-tetrol, (+)-Galactose, Epitope ID:141794, D-(+)-Galactose, (3R,4S,5R,6R)-6-methyloltetrahydropyran-2,3,4,5-tetrol, (3R,4S,5R,6R)-6-(Hydroxymethyl)tetrahydro-2H-pyran-2,3,4,5-tetraol	https://pubchem.ncbi.nlm.nih.gov/compound/6036	D-galactopyranose is a galactopyranose having D-configuration. It has a role as an Escherichia coli metabolite and a mouse metabolite. It is a D-galactose and a galactopyranose.	Wilsons disease, supplementation for the treatment of MOGHE, food supplement in congenital disorders of glycosylation, macrophage activation markers during sofosbuvir-based treatment regimes of chronic hepatitis C, postprandial lipemia, focal segmental glomerulosclerosis (FSGS) permeability factor, permeability factor in patients With FSGS and CKD Stage 5, children with steroid resistant nephroti…		C6H12O6	180	-3.17	Yes	Yes	Yes	No	No	No	No
(2S,4R)-pentane-1,2,3,4,5-pentol (87-99-0)	Ribitol, Adonitol, Xylite, D-Xylitol, Adonite, D-ribitol, 1,2,3,4,5-Pentanepentol, (2R,3R,4S)-Pentane-1,2,3,4,5-pentaol, meso-ribitol, meso-xylitol, L-xylitol, D-Adonitol, (2R,3s,4S)-pentane-1,2,3,4,5-pentol, (2R,3S,4S)-Pentane-1,2,3,4,5-pentaol, (2S,4R)-pentane-1,2,3,4,5-pentol, 1,2,3,4,5-Pentahydroxypentane, Xylooligosaccharide, (2R,3r,4S)-pentane-1,2,3,4,5-pentol, xylo-Pentitol, Xylitol, Wood …	https://pubchem.ncbi.nlm.nih.gov/compound/6912	Xylitol is a naturally occurring five-carbon sugar alcohol found in most plant material, including many fruits and vegetables. Xylitol-rich plant materials include birch and beechwood. It is widely used as a sugar substitute and in "sugar-free" food products.	Prevention of dental caries, tooth decay and dry mouth; sugar substitute, cardioplegia, cosmetics (humectant; skin conditioning).		C5H12O5	152	-3.77	Yes	Yes	No	No	No	No	No
nonanedioic acid (123-99-9)	Azelaic acid, Anchoic acid, Lepargylic acid, 1,7-Heptanedicarboxylic acid, 1,9-Nonanedioic acid, Heptanedicarboxylic acid, n-Nonanedioic acid, Azelainic acid, Acidum azelaicum, Azelate, 1,7-Dicarboxyheptane, Emery's L-110, Lepargylate, Anchoate, n-Nonanedioate, 1,9-Nonanedioate, 1,7-Heptanedicarboxylate	https://pubchem.ncbi.nlm.nih.gov/compound/2266	Azelaic Acid is a naturally occurring dicarboxylic acid produced by Malassezia furfur and found in whole grain cereals, wheat, rye, barley and animal products.	Antibacterial, keratolytic, comedolytic, anti-inflammatory and anti-oxidant activity; food additive; cosmetics (buffering); treatment of atherosclerosis, dermatitis and Hutchinson's Melanotic Freckle, melanosis, psoriasis, hyperpigmentation.		C9H16O4	188	1.33	Yes	Yes	Yes	No	No	No	No
2-benzamidoacetic acid (495-69-2)	Hippuric acid, N-Benzoylglycine, Hippurate, Benzoylaminoacetic acid, Phenylcarbonylaminoacetic acid, (benzoylamino)acetic acid, Bz-Gly-OH, 2-(Phenylformamido)acetic acid, N-(Phenylcarbonyl)glycine, N-Benzoylglycinate, Benzoylglycocoll, 2-Benzamidoethanoic acid, 2-(Benzoylamino)acetic acid	https://pubchem.ncbi.nlm.nih.gov/compound/464	Hippuric Acid is an acyl glycine produced by the conjugation of benzoic acid and glycine, found as a normal component in urine as a metabolite of aromatic compounds from food. It has a role as a uremic toxin and a human blood serum metabolite.	Antibacterial effects, cosmetics (hair conditioning).		C9H9NO3	179	0.31	Yes	Yes	Yes	No	No	No	No
2-(N-acetylanilino)acetate (579-98-6)	N-Phenyl-N-acetyl-glycine, (Acetylanilino)acetic acid, 2-(N-phenylacetamido)acetic acid, N-Phenylaceturic acid, acetyl-N-phenylglycine	https://pubchem.ncbi.nlm.nih.gov/compound/68483	Found as its trimethylsilyl ester.	Chemists sometimes use a trimethylsilylating reagent to derivatize rather non-volatile compounds such as certain alcohols, phenols, or carboxylic acids by substituting a trimethylsilyl group for a hydrogen in the hydroxyl groups on the compounds.		C14H11NO4	221	0.24	Yes	Yes	Yes	No	No	No	No
(2R)-2-[(2S,3R,4S)-3,4-dihydroxy-5-oxooxolan-2-yl]-2-hydroxyacetaldehyde (32449-92-6)	D-Glucurono-3,6-lactone, D-Glucuronic acid lactone, Glucurone, (+)-glucurono-3,6-lactone, Glucurono-6,3-lactone, D-Glucofuranuronic acid gamma-lactone, D-Glucuronic acid g-lactone, Glucuronic acid-3,6-lactone, D-(+)-Glucuronolactone, D-Glucuronic acid gamma-lactone, D-glucofuranuronate gamma-lactone, (2R)-((2S,3R,4S)-3,4-dihydroxy-5-oxotetrahydrofuran-2-yl)-2-hydroxyacetaldehyde	https://pubchem.ncbi.nlm.nih.gov/compound/92283	It has a role as a human metabolite and a mouse metabolite. It derives from a D-glucuronic acid (a sugar acid formed by the oxidation of the C-6 carbon of glucose. In addition to being a key intermediate metabolite of the uronic acid pathway, glucuronic acid also plays a role in the detoxification of certain drugs and toxins by conjugating with them to form glucuronides).	Cosmetics (skin conditioning), bionic multilayer collagen scaffold for cartilage repair, preparation treatment or alleviation neurotoxic diseases drug, reducing suckling pig diarrhea, antituberculous activity.		C6H10O6	178	-2.38	Yes	Yes	No	No	No	Yes	Yes
hexadecanoic acid (57-10-3)	Palmitic acid, Cetylic acid, Palmitate, n-Hexadecanoic acid, Hexadecylic acid, Hydrofol, n-Hexadecoic acid, 1-Pentadecanecarboxylic acid, Palmitinic acid, C16 Fatty acid, Hexaectylic acid, 1-Hexyldecanoic Acid, Hydrofol Acid 1690, n-Hexadecoate, Pentadecanecarboxylate, Hexadecanoate (n-C16:0), Palmitoate, Palmitinate, Palmitoic acid, Aethalic acid	https://pubchem.ncbi.nlm.nih.gov/compound/985	Palmitic acid is found naturally in palm oil and palm kernel oil, as well as in butter, cheese, milk and meat. It has a role as an EC 1.1.1.189 (prostaglandin-E2 9-reductase) inhibitor, a plant metabolite, a Daphnia magna metabolite and an algal metabolite. Palmitic acid is the first fatty acid produced during lipogenesis (fatty acid synthesis) and from which longer fatty acids can be produced.	Leptin function, flavoring agent, enzyme inhibitor, it is required for biosynthesis of lung lecithin, which is related to fetal maturation (radiochromatogram showed high incorporation of palmitate into lecithin by fetal lung. Content in palm oil in Nigerian meals can partly be related to low incidence of respiratory distress), surfactant, cosmetics (emollient; emulsifying).		C16H32O2	256	7.15	No	No	No	No	No	Yes	No
3-phenylpropanoic acid (501-52-0)	Hydrocinnamic acid, 3-Phenylpropionic acid, Benzenepropanoic acid, Benzylacetic acid, Dihydrocinnamic acid, Benzenepropionic acid, Phenylpropanoate, Phenylpropanoic acid, beta-phenylpropionic acid, Hydrocinnamate, 3-Phenyl-n-propionic acid, beta-phenylpropionate, Dihydrocinnamate, Benzenepropionate, b-Phenylpropionate, w-Phenylpropanoate, omega-Phenylpropanoate, w-Phenylpropanoic acid, 3-Phenyl-n…	https://pubchem.ncbi.nlm.nih.gov/compound/107	Plant and human metabolite.	Antifungal agent, flavoring agent, inhibits the Currents of WT and SQT3 Syndrome-Related Mutants of Kir2.1 Channel.		C9H10O2	150	1.84	Yes	Yes	No	No	Yes	Yes	Yes
7-[3,5-dihydroxy-2-(3-hydroxyoct-1-enyl)cyclopentyl]heptanoic acid (745-62-0)	Prostaglandin F1a	https://pubchem.ncbi.nlm.nih.gov/compound/4957	Present in seeds and dry fruits.	Cytoprotector (protecting mucosal tissue from damage produced by ulcerogenic stimuli), prevention of cardiogenic diseases and chronic inflammatory diseases (arthritis and cancer).		C20H36O5	356	2.60	Yes	No	Yes	No	No	Yes	Yes
5-[(2S,3R,4S,5R)-3,4-dihydroxy-5-(hydroxymethyl)oxolan-2-yl]-1H-pyrimidine-2,4-dione (1445-07-4)	Pseudo uridine, beta-Pseudouridine, psi-Uridine, 5-(beta-D-Ribofuranosyl)uracil, 5-((2S,3R,4S,5R)-3,4-Dihydroxy-5-(hydroxymethyl)tetrahydrofuran-2-yl)pyrimidine-2,4(1H,3H)-dione, Pseudouridine C, 5-Ribosyluracil, (1S)-1,4-Anhydro-1-(2,4-dioxo-1,2,3,4-tetrahydropyrimidin-5-yl)-D-ribitol, b-Pseudouridine, y-Uridine, b-D-Pseudouridine	https://pubchem.ncbi.nlm.nih.gov/compound/15047	A naturally-occurring isomer of uridine found in RNA, in which ribosyl is attached to a carbon instead of a nitrogen atom. It has a role as a fundamental metabolite.	Powerful tool to repair UVB-induced DNA lesions.		C9H12N2O6	244	-0.37	Yes	No	Yes	No	No	Yes	Yes
(3R,4S,5S,6R)-6-[[(2S,3R,4S,5R,6R)-3,4,5-trihydroxy-6-(hydroxymethyl)oxan-2-yl]oxymethyl]oxane-2,3,4,5-tetrol (5340-95-4)	Melibiose, Gal-alpha(1,6)Glc, 6-O-alpha-D-Galactopyranosyl-D-glucopyranose, D-Gal-alpha1→6-D-Glucose, alpha-D-Gal-(1→6)-D-Glc, alpha-D-galactosyl-(1→6)-D-glucose, D-melibiose, alpha-D-Galp-(1→6)-D-Glc, D-Gal-alpha(1→6)-D-glucose, alpha-D-Galp-(1→6)-D-Glcp, 6-(alpha-D-galactosido)-D-glucose, alpha-D-galactopyranosyl-1-6-D-glucopyranose	https://pubchem.ncbi.nlm.nih.gov/compound/440658	Plant metabolite, a Saccharomyces cerevisiae metabolite, an Escherichia coli metabolite, a mouse metabolite and an elastin-laminin receptor agonist.	Up-regulate autophagy to reduce neuronal vulnerability.		C12H22O11	342	-3.20	No	No	No	No	No	Yes	Yes
(4R,5R,6R)-6-(hydroxymethyl)oxane-2,4,5-triol (1949-89-9)	2-Deoxy-galactopyranose, 2-Deoxy-D-galactopyranose, 2-Deoxy-D-lyxohexose, 2-Deoxy-D-lyxo-hexopyranose, (4R,5R,6R)-6-(Hydroxymethyl)tetrahydro-2H-pyran-2,4,5-triol, 2-Deoxy-D-galactose	https://pubchem.ncbi.nlm.nih.gov/compound/439804	Glucose analogue very effective in the inhibition of glucose metabolism and ATP production.	Inhibition of glycolysis and thereby tumor (cancer) growth, interference with the biosynthetic processing of glycoproteins, antiviral activity, and hepatotoxicity.		C6H12O5	164	-3.07	Yes	Yes	No	No	No	Yes	Yes
(E)-octadec-9-enoic acid (112-79-8)	trans-9-Octadecenoic acid, trans-Oleic acid, (E)-octadec-9-enoic acid, (E)-Oleic acid, (E)-9-octadecenoic acid, (9E)-octadec-9-enoic acid, trans-Elaidic acid, 9-Elaidic acid, 9E-octadecenoic acid, trans-DELTA9-Octadecenoic acid, (9E)-Octadecenoic acid, 9-trans-Octadecenoic acid, D9-trans-Octadecenoic acid, trans-D9-Octadecenoic acid, Delta(9)-Octadecenoic acid, trans-delta9-Octadecenoic acid, Del…	https://pubchem.ncbi.nlm.nih.gov/compound/637517	An unsaturated fatty acid that is the most widely distributed and abundant fatty acid in nature. Food component.	Pharmaceutical solvent, electronics, toys.		C18H34O2	282	7.70	No	No	No	No	No	Yes	No
2-hydroxypropanoic acid (50-21-5)	Lactic acid, 2-hydroxypropanoic acid, DL-Lactic acid, 2-Hydroxypropionic acid, Milk acid, Lactate, Racemic lactic acid, Ordinary lactic acid, alpha-Hydroxypropionic acid, 1-Hydroxyethanecarboxylic acid, (±)-2-Hydroxypropanoic acid, Sarcolactic acid, H-D-Lac-OH, (±)-Lactic acid, Polactide, 1-Hydroxyethane 1-carboxylic acid, 2-Hydroxy-2-methylacetic acid	https://pubchem.ncbi.nlm.nih.gov/compound/612	Lactic acid or lactate is produced during fermentation from pyruvate by lactate dehydrogenase. A normal intermediate in the fermentation (oxidation, metabolism) of sugar.	Cultured dairy products, food preservative, to make chemicals, non-hormonal contraceptive agent, alkalinizing agent, flavoring agent, plant growth regulator, gynecological antiinfectives and antiseptics, cosmetics (buffering; humectant; skin conditioning).		C3H6O3	90	-0.70	Yes	Yes	No	No	Yes	Yes	Yes
Acetic acid (64-19-7)	Ethanoic acid, Ethylic acid, glacial, Glacial acetic acid, Methanecarboxylic acid, Acetic acid glacial, Vinegar acid, Pyroligneous acid, ethanoate, methane carboxylic acid, Ethylate, Glacial acetate, Methanecarboxylate	https://pubchem.ncbi.nlm.nih.gov/compound/176	It is a conjugate acid of an acetate.	Antibacterial (ear, nose and throat infections), antifungal, protic solvent, a food acidity regulator, an antimicrobial food preservative, a Daphnia magna metabolite, herbicide, cosmetics (buffering).		C2H4O2	60	-0.29	Yes	Yes	No	No	Yes	Yes	No
(2S)-2-aminopropanoic acid (56-41-7)	L-alpha-alanine, (S)-2-Aminopropanoic acid, L-2-Aminopropionic acid, L-(+)-Alanine, L-2-Aminopropanoic acid, L-alpha-Aminopropionic acid, (S)-(+)-Alanine, (2S)-2-azanylpropanoic acid, (2S)-2-aminopropanoate	https://pubchem.ncbi.nlm.nih.gov/compound/5950	Small non-essential amino acid in humans, Alanine is one of the most widely used for protein construction and is involved in the metabolism of tryptophan and vitamin pyridoxine.	It is involved in sugar and acid metabolism, increases immunity, and provides energy for muscle tissue, brain, and the central nervous system, and displays a cholesterol-reducing effect in animals, treatment of Multiple Myeloma (medulla cancer), flavoring agent, cosmetics (antistatic).		C3H7NO2	89	-0.68	Yes	Yes	No	No	Yes	Yes	Yes
2-aminoacetic acid (56-40-6)	Glycine, Glycocoll, Aminoethanoic acid, H-Gly-OH, Aminoethanoate, 2-aminoacetate	https://pubchem.ncbi.nlm.nih.gov/compound/750	Glycine is a non-essential, non-polar, non-optical, glucogenic amino acid.	It has a role as a nutraceutical, a hepatoprotective agent, an EC 2.1.2.1 (glycine hydroxymethyltransferase) inhibitor, a NMDA receptor agonist, a micronutrient, a fundamental metabolite and a neurotransmitter; antispastic activity, antipsychotic activity as well as antioxidant and anti-inflammatory activities; flavoring agent; cosmetics (antistatic; Buffering; Hair conditioning; Skin conditionin…		C2H5NO2	75	-1.03	Yes	Yes	No	No	Yes	Yes	No
oxalic acid (144-62-7)	Ethanedioic acid, Oxiric acid, Ethanedionic acid	https://pubchem.ncbi.nlm.nih.gov/compound/971	Plant metabolite and an algal metabolite.	Ascorbic acid ingestion in high doses is associated with oxalate deposition in tissue in dialysis patients; food additive; cosmetics (chelating).		C2H2O4	90	-1.19	Yes	Yes	No	No	Yes	No	No
2-methylphenol; 3-methylphenol; 4-methylphenol (95-48-7; 108-39-4; 106-44-5)	Cresol	https://pubchem.ncbi.nlm.nih.gov/compound/24693	It is produced by bacterial fermentation of proteins in the large intestine, is a major component in pig odor. Temporal glands secretion examination showed the presence of phenol and p-cresol during musth in male elephants, is one of the very few compounds to attract the orchid bee Euglossa cyanura and has been used to capture and study the species, and is a component found in horse urine during …	Potential anti-Alzheimer agent.		C7H8O	108	1.94	Yes	Yes	No	No	Yes	No	No
2-hydroxy-2-methylpropanoic acid (594-61-6)	Hydroxyisobutyric acid, 2-Methyllactic acid, 2-Hydroxy-2-methylpropanoic acid, Acetonic acid, alpha-Hydroxyisobutyric acid, 2-Hydroxy-2-methylpropionic acid, Hydroxydimethylacetic acid, alpha-Hydroxyisobutanoic acid, 2-Methyl-2-hydroxy-2-methylpropanoic acid, alpha-Hydroxy-alpha-methylpropanoic acid, a-hydroxyisobutyric acid, 2-Methyllactate, alpha-Hydroxyisobutyrate, alpha-Hydroxyisobutanoate, 2…	https://pubchem.ncbi.nlm.nih.gov/compound/11671	Plant metabolite and a Daphnia magna metabolite. It is a metabolite of methyl tertiary-butyl ether.	Topical treatment of ichthyotic disorders, flavoring agent, fungicide, cosmetics (buffering).		C4H8O3	104	-0.35	Yes	Yes	No	No	Yes	Yes	No
3-hydroxy-3-methylbutanoic acid (625-08-1)	beta-Hydroxyisovaleric acid, 3-Hydroxyisovaleric acid, 3-Hydroxy-3-methylbutyric acid, 3-OH-isovaleric acid, b-hydroxyisovaleric acid, beta-Hydroxy-beta-methylbutyrate, beta-Hydroxy beta-methylbutyric acid, 3-Hydroxy-3-Methyl butanoic Acid, b-hydroxyisovalerate, 3-Hydroxy-3-methylbutanoate	https://pubchem.ncbi.nlm.nih.gov/compound/69362	Plant and mammal metabolite. It derives from a butyric acid and an isovaleric acid.	Muscle athropy.		C5H10O3	118	-0.79	Yes	Yes	No	No	Yes	Yes	No
urea (57-13-6)	Carbamide, Carbonyldiamide, Carbonyldiamine, Amino ketone	https://pubchem.ncbi.nlm.nih.gov/compound/1176	It is formed in the liver via the urea cycle from ammonia and is the final end product of protein metabolism.	Skin hydratation, accelerate fibrin degradation, antipruritic, break down keratin, decrease the thickness of the stratum corneum and are used in scaling conditions such as ichthysosis, food additive, insectide.		CH4N2O	60	-2.11	Yes	Yes	No	No	Yes	No	No
benzoic acid (65-85-0)	Dracylic acid, Benzenecarboxylic acid, Carboxybenzene, Benzeneformic acid, Phenylformic acid, Benzenemethanoic acid, Phenylcarboxylic acid, Benzoate, Diacylic acid, Oracylic acid, Benzenemethonic acid, Diacylate, Benzeneformate, Phenylformate, Benzenemethanoate, Phenylcarboxylate, Benzenecarboxylate, Dracylate	https://pubchem.ncbi.nlm.nih.gov/compound/243	Benzoic acid naturally occurs in cranberries, prunes, strawberries, apples and yogurts.	Used to make other chemicals, as a antimicrobial food preservative, treatment of hyperammonemia in patients with urea cycle disorders, herbicide, insecticide, antifungal agent, inhibiting metastases of an endothelin b receptor expressing cancer.		C7H6O2	122	1.89	Yes	Yes	No	No	Yes	No	No
2-phenylacetic acid (103-82-2)	Benzeneacetic acid, Phenylethanoic acid, alpha-Toluic acid, Phenylacetate, Benzylformic acid, Phenyllacetic acid, Benzylcarboxylic acid, omega-Phenylacetic acid, Benzeneacetate, Phenylethanoate, w-Phenylacetate, alpha-Toluate, a-Toluate, a-Toluic acid, omega-Phenylacetate, w-Phenylacetic acid	https://pubchem.ncbi.nlm.nih.gov/compound/999	It has a role as a toxin, a human metabolite, an Escherichia coli metabolite, a plant metabolite, a Saccharomyces cerevisiae metabolite, an EC 6.4.1.1 (pyruvate carboxylase) inhibitor, an Aspergillus metabolite, a plant growth retardant, an allergen and an auxin.	Adjunctive therapy for the treatment of acute hyperammonemia and associated encephalopathy in patients with deficiencies in enzymes of the urea cycle, flavoring agent, antimetabolite that is useful in cancer chemotherapy, treatment of braf-associated diseases and disorders, treatment and prevention of bronchiolitis obliterans, antimalarial activity.		C8H8O2	136	1.50	Yes	Yes	No	No	Yes	No	No
benzene-1,2-diol (120-80-9)	Pyrocatechol, Catechol, 1,2-Benzenediol, 1,2-Dihydroxybenzene, Pyrocatechin, 2-Hydroxyphenol, o-Benzenediol, o-Dihydroxybenzene, i-Dioxybenzene, o-Hydroquinone, o-Hydroxyphenol, o-Phenylenediol, Oxyphenic acid, Phthalhydroquinone, o-Diphenol, ortho-Dihydroxybenzene, ortho-Hydroxyphenol, ortho-Benzenediol, ortho-Dioxybenzene, ortho-Hydroquinone, ortho-Phenylenediol, Pyrocatechinic acid, Phthalic a…	https://pubchem.ncbi.nlm.nih.gov/compound/289	It has a role as a genotoxin, Hazardous Air Pollutants (HAPs), an allelochemical and a plant metabolite.	Flavoring agent, carcinogens, mutagens.		C6H6O2	110	0.88	Yes	Yes	No	No	Yes	No	No
2-hydroxybenzoic acid (69-72-7)	Salicylic acid, o-Hydroxybenzoic acid, 2-Carboxyphenol, o-Carboxyphenol, Phenol-2-carboxylic acid, ortho-Hydroxybenzoic acid, ortho-Salicylic acid, 2-Hydroxybenzoate, 2-Hydroxybenzenecarboxylate	https://pubchem.ncbi.nlm.nih.gov/compound/338	Acid that occurs as a natural compound in plants.	It has direct activity as an anti-inflammatory agent and acts as a topical antibacterial agent due to its ability to promote exfoliation, treatment of skin disorders (acne, psoriasis, callouses, corns, keratosis pilaris and warts), flavoring agent, cosmetics (keratolytic; preservative).		C7H6O3	138	2.06	Yes	Yes	No	No	Yes	No	No
3-methylhexanedioic acid (3058-01-3)	3-Methyladipic acid, beta-Methyl-adipic acid	https://pubchem.ncbi.nlm.nih.gov/compound/12292	It is naturally found in beets and sugar cane.	Adhesive, heat transfer fluids.		C7H12O4	160	0.43	Yes	Yes	No	No	No	Yes	Yes
1-methylimidazol-2-amine (6646-51-1)	1-Methyl-1H-imidazol-2-amine, 2-Amino-1-methylimidazole, 1H-Imidazol-2-amine, 1-Methyl-1H-imidazol-2-ylamine, 2-Amino-N-methyl-imidazole	https://pubchem.ncbi.nlm.nih.gov/compound/566321	It exists in all living organisms, ranging from bacteria to humans, and participates in a number of enzymatic reactions.	Specialty solvent, a base, and as a precursor to some ionic liquids.		C4H7N3	97	-0.47	Yes	Yes	No	No	Yes	No	No
3-hydroxybenzoic acid (99-06-9)	m-Hydroxybenzoic acid, m-Salicylic acid, 3-Carboxyphenol, m-Hba, meta-Hydroxybenzoic acid, m-Hydroxybenzoate, m-salicylate, 3-Hydroxy benzoate, meta-Hydroxybenzoate, meta-Salicylic acid	https://pubchem.ncbi.nlm.nih.gov/compound/7420	Bacterial metabolite and a plant metabolite. Disinfectant byproduct and drinking water contaminant.	It is used as an intermediate in the synthesis of plasticisers, resins, pharmaceuticals; flavoring agent; balsamic.		C7H6O3	138	1.50	Yes	Yes	No	No	Yes	No	No
3-hydroxy-3-(3-hydroxyphenyl)propanoic acid (3247-75-4)	3-(3-Hydroxyphenyl)-3-hydroxypropanoic acid, 3-(3-Hydroxyphenyl)-3-hydroxypropionic acid, 3'-Hydroxyphenylhydracrylic acid, b-(m-Hydroxyphenyl)hydracrylic acid, 3-(m-Hydroxyphenyl)hydracrylic acid, 3-(3-Hydroxyphenyl)hydracrylic acid, beta-(m-Hydroxyphenyl)hydracrylic acid, 3-Hydroxy-3-(3-hydroxyphenyl)propionic acid, beta-(meta-Hydroxyphenyl)hydracrylic acid, b-(m-Hydroxyphenyl)hydracrylate, 3-(…	https://pubchem.ncbi.nlm.nih.gov/compound/102959	It has a role as an Escherichia coli metabolite.	Treating and preventing cns disorders and other conditions caused by gut microbial dysbiosis, gut-selective sequestering agents for the treatment and prevention of autism and related disorders.		C9H10O4	182	-0.45	Yes	Yes	No	No	Yes	No	Yes
heptanedioic acid (111-16-0)	Pimelic acid, 1,5-Pentanedicarboxylic acid, Pileric acid, Heptandioic acid, Heptane-1,7-dioic acid, 6-Carboxyhexanoate, Pimelate, 1,7-Heptanedioic acid, Heptanedioate, 6-Carboxyhexanoic acid, Heptandioate, Pilerate, Pentane-1,5-dicarboxylic acid, 1,7-Heptanedioate, Heptane-1,7-dioate	https://pubchem.ncbi.nlm.nih.gov/compound/385	It has a role as an Escherichia coli metabolite and a Daphnia magna metabolite.	Lubricants, lubricant additives, plasticizers.		C7H12O4	160	0.27	Yes	Yes	No	No	No	Yes	No
2-[(2-hydroxybenzoyl)amino]acetic acid (487-54-7)	2-Hydroxyhippuric acid, Salicyluric acid, Salicylurate, N-Salicyloylglycine, N-(2-Hydroxybenzoyl)glycine, 2-(2-Hydroxybenzamido)acetic acid, 2-hydroxyhippuric acid, N-o-Hydroxybenzoylglycine, 2-Hydroxybenzoylglycine, (2-Hydroxybenzoyl)glycine, o-Hydroxyhippurate, 2-[(2-Hydroxyphenyl)formamido]acetic acid, ortho-Hydroxyhippuric acid, 2-Hydroxyhippurate, ortho-Hydroxyhippurate, o-Hydroxyhippuric ac…	https://pubchem.ncbi.nlm.nih.gov/compound/10253	It has a role as a uremic toxin and a human xenobiotic metabolite. It is a metabolite of rutin detected in urine after consumption of tomato juice (a source of rutin).	Analgesic, antiinflamatory.		C9H9NO4	195	0.65	Yes	Yes	Yes	No	No	No	No
7,9-dihydro-3H-purine-2,6,8-trione (7,9-Dihydro-1H-purine-2,6,8(3H)-trione (69-93-2)	Uric acid, Urate, 2,6,8-Trioxypurine, Lithic acid, 2,6,8-Trihydroxypurine, 2,6,8-Trioxopurine, 7,9-Dihydro-1H-purine-2,6,8(3H)-trione, 8-hydroxyxanthine, 7,9-Dihydro-1H-Purine-2,6,8-triol, Purine-2,6,8(1H,3H,9H)-trione, 2,3,6,7,8,9-Hexahydro-1H-purine-2,6,8-trione, 9H-Purine-2,6,8-triol, 1H-purine-2,6,8(3H,7H,9H)-trione, 8-Hydroxy-3,9-dihydro-1H-Purine-2,6-dione, 6,8-Dioxo-6,7,8,9-tetrahydro-1H-p…	https://pubchem.ncbi.nlm.nih.gov/compound/1175	Uric acid is the last product of purine metabolism.	The potential therapeutic use for uric acid is as an adjunct in acute ischemic stroke; cosmetics (buffering; skin conditioning), antioxidant; prevention of Chronic Kidney Disease (CKD).		C5H4N4O3	168	-1.08	Yes	Yes	No	No	No	No	No
2-[(3-Hydroxybenzoyl)amino]acetate (1637-75-8)	m-Hydoxyhippuric acid, 3-Hydroxyhippuric acid N-[3-Hydroxy]benzoyl]glycine, ((3-[hydroxy]benzoyl)amino)acetate	https://pubchem.ncbi.nlm.nih.gov/compound/450268	Found as its bis-trimethylsilyl derivative. The same of hippuric acid.	The same of hippuric acid.		C9H9NO4	339	-0.04	Yes	Yes	No	No	No	No	No
(3S,4R,5S)-5-[(1R)-1,2-dihydroxyethyl]oxolane-2,3,4-triol (30077-17-9)	D-(+)-Talofuranose, (3S,4R,5S)-5-[(1R)-1,2-dihydroxyethyl]oxolane-2,3,4-triol, talofuranose, D-talo-hexofuranose	https://pubchem.ncbi.nlm.nih.gov/compound/53664879	Carbohydrate.	Carbohydrate-glycolipid conjugate vaccines, treatment of copd and allergic rhinitis, mitochondrially targeted antioxidants, cell adhesion inhibitors.		C6H12O6	180	-1.81	Yes	Yes	No	No	No	No	Yes
(2S,3S,4S,5R,6S)-3,4,5-trihydroxy-6-(4-methylphenoxy)oxane-2-carboxylic acid (17680-99-8)	p-Tolyl-b-d-glucuronide, p-Cresol glucuronide, p-Cresyl glucuronide, p-Cresylglucuronide, beta-D-Glucopyranosiduronic acid 4-methylphenyl, p-Tolyl-beta-D-glucuronide, p-Cresyl-beta-D-glucuronide, 4-Methylphenyl beta-D-glucopyranosiduronate, (2S,3S,4S,5R,6S)-3,4,5-trihydroxy-6-(p-tolyloxy)tetrahydro-2H-pyran-2-carboxylic acid	https://pubchem.ncbi.nlm.nih.gov/compound/154035	It is a metabolite of o-Cresol (it is mainly generated as an end product of tyrosine biotransformation by anaerobic intestinal bacteria).	Disinfectant and have also been used as antiseptic in surgery; cresols are used to dissolve other chemicals and as deodorizers.		C13H16O7	284	-0.37	Yes	Yes	Yes	No	No	Yes	Yes
(2S,3R,4S,5R)-3,4,5,6-tetrahydroxyoxane-2-carboxylic acid (9046-38-2)	d-Galacturonic acid, D-GalA, D-Galactopyranuronate, D-Galactopyranuronic Acid, D-Galacturonate, Galacturonic Acid, Galacturonate, (2S,3R,4S,5R)-3,4,5,6-tetrahydroxyoxane-2-carboxylic acid, (2S,3R,4S,5R)-3,4,5,6-tetrahydroxytetrahydro-2H-pyran-2-carboxylic acid	https://pubchem.ncbi.nlm.nih.gov/compound/439215	It is the main component of pectin, a structural heteropolysaccharide in plants.	Protecting ocular nerve containing chalcone derivates, food humectant, antifungic, food suplement to add help at recovering from chronic diseases.		C6H10O7	194	-2.88	Yes	Yes	No	No	No	Yes	Yes
3-methylheptan-4-one (15726-15-5)	4-Heptanone-3-methyl, 3-Methyl sec-butyl propyl ketone	https://pubchem.ncbi.nlm.nih.gov/compound/27470	Compound in crop species.	Priming material for organometallic resist, treating PTSD and/or anxiety, photosensitive resin composition, uv blocker, treating autism, electronical batteries, treating sleep disorder.		C8H16O	128	2.32	Yes	Yes	No	No	No	Yes	No
butyl butanoate (109-21-7)	Butanoic acid butyl ester, Butyl butyrate, n-Butyl butyrate, n-Butyl butanoate, 1-Butyl butyrate, Butyric acid butyl ester, Butyl butylate, Butyl n-butyrate, n-Butyl n-butanoate, Butyryl butyrate, Butyl butyrate, Butyric acid n-butyl ester, Butyl ester of butanoic acid, n-Butyric acid n-butyl ester	https://pubchem.ncbi.nlm.nih.gov/compound/7983	Marine pollutant. May penetrate soils and contaminate groundwater and nearby waterways.	Flavoring agent, electronical batteries.		C8H16O2	144	2.83	Yes	Yes	No	No	No	Yes	No
1-N,1-N,2-N,2-N-tetrafluoro-2-methylpropane-1,2-diamine (16063-24-4)	Propane 1,2-bis(difluoroamino)-2-methyl-, 1,2-Bis(difluoramino)isobutane, 1-Methyl-2,3-bis(difluoroamino)propane, N,N,N',N'-Tetrafluor-2-methyl-1,2-propylendiamine, N1,N1,N2,N2-tetrakis(fluoranyl)-2-methyl-propane-1,2-diamine	https://pubchem.ncbi.nlm.nih.gov/compound/85260	By-product of natural gas processing and crude oil refining.	Burning rate modifier.		C4H8F4N2	160	-2.39	Yes	Yes	No	No	No	Yes	No
1,1-dibutoxybutane (5921-80-2)	Butane 1,1-dibutoxy, Butyraldehyde dibutyl acetal, butanal dibutyl acetal, n-Butyraldehyde di-n-butyl acetal	https://pubchem.ncbi.nlm.nih.gov/compound/22210	Compound in crop species.	Repairing and coating coated body.		C12H26O2	202	4.33	Yes	Yes	Yes	No	No	Yes	No
pentanoic acid (109-52-4)	Valeric acid, n-Valeric acid, n-Pentanoic acid, Valerianic acid, Propylacetic acid, 1-Butanecarboxylic acid, Butanecarboxylic acid, Pentanoate, Pentoic acid, n-Pentanoate, Valerate, Butane-1-carboxylic acid, Pentoate, Propylacetate, Valerianate, 1-Butanecarboxylate	https://pubchem.ncbi.nlm.nih.gov/compound/7991	Plant metabolite, is formed by rumen microorganisms during the metabolism of proline, leucine, isoleucine, norleucine, and several intermediates of carbohydrate metabolism.	Flavoring agent, antibacterial and mildew-proof coating with good weather resistance, chemical industry emulsifier.		C5H10O2	102	1.31	Yes	Yes	No	No	Yes	Yes	No
butyl 4-hydroxybenzoate (94-26-8)	Butylparaben, Butyl 4-hydroxybenzoate, Butyl paraben, Butyl p-hydroxybenzoate, n-Butyl p-hydroxybenzoate, 4-(Butoxycarbonyl)phenol, Benzoic acid 4-hydroxy- butyl ester, 4-Hydroxybenzoic acid butyl ester, p-Hydroxybenzoic acid butyl ester, n-Butyl-4-hydroxybenzoate, 4-hydroxybenzoic butyl ester	https://pubchem.ncbi.nlm.nih.gov/compound/7184	Fruit and vegetable products, such as barley, flax seed, and grapes. Butylparaben has also been found to be produced in some microorganisms including Microbulbifer.	Cosmetics (preservative), flavoring agent, sun protection factor, chemical allergen (increased histamine release, and cell-mediated Immunity).		C11H14O3	194	3.46	Yes	Yes	Yes	No	No	Yes	No
hydroxylamine (7803-49-8)	Nitroxide, Oxammonium, Hydroxyamine, Oxyammonia, Dihydridohydroxidonitrogen, Nitrinous acid, Hydroxy amine, Azinous acid, N-hydroxyamine, Amine N-oxide, Oxoniumylideneazanide	https://pubchem.ncbi.nlm.nih.gov/compound/787	It is an intermediate in the biological nitrification by microbes like bacteria.	Food additive, as reducing agent in photography; in synthetic and analytical chemistry; to purify aldehydes and ketones; as antioxidant for fatty acids and soaps; as dehairing agent for hides; solvents (which become part of product formulation or mixture).		H3NO	33	-0.81	Yes	Yes	No	No	Yes	No	No
(9Z,12Z,15Z)-octadeca-9,12,15-trienoic acid (463-40-1)	9,12,15-Octadecatrienoic acid, Linolenic acid, alpha-Linolenic acid, linolenate, (9Z,12Z,15Z)-octadeca-9,12,15-trienoic acid, a-Linolenic acid, cis,cis,cis-9,12,15-Octadecatrienoic acid, all-cis-9,12,15-Octadecatrienoic acid, 9-cis,12-cis,15-cis-Octadecatrienoic acid, (Z,Z,Z)-9,12,15-Octadecatrienoic acid, (9,12,15)-Linolenic acid, cis-delta9,12,15-Octadecatrienoic acid, cis-9, cis-12, cis-15-Oct…	https://pubchem.ncbi.nlm.nih.gov/compound/5280934	It is an essential fatty acid belonging to the omega-3 fatty acids group. It is highly concentrated in certain plant oils.	Inhibits the synthesis of prostaglandin resulting in reduced inflammation and prevention of certain chronic diseases; antithrombotic effect, nutraceutical use, nutritional supplementation and for treating dietary shortage or imbalance, decrease the risk of cardiovascular diseases, cosmetics (antistatic; cleansing; emollient; emulsifying; hair conditioning; skin conditioning; surfactant).		C18H30O2	278	6.50	No	No	No	No	No	No	No
creatine (57-00-1)	N-amidinosarcosine, 2-(1-Methylguanidino)acetic acid, N-Methyl-N-guanylglycine, Methylglycocyamine, (alpha-Methylguanido)acetic acid, Pyrolysate, N-carbamimidoyl-N-methylglycine, 2-(1-methylcarbamimidamido)acetic acid, alpha-Methylguanidino acetic acid, 2-[carbamimidoyl(methyl)amino]acetic acid, N-[(E)-Amino(imino)methyl]-N-methylglycine, (alpha.-Methylguanido)acetic acid, (N-methylcarbamimidamid…	https://pubchem.ncbi.nlm.nih.gov/compound/586	It is an endogenous amino acid derivative produced by vertebrate animals and occurring primarily in muscle cells. Creatine is important for energy storage; it is phosphorylated to creatine phosphate, which serves as a phosphate donor in the conversion of ADP to ATP and supplies energy necessary for muscle contraction. Dietary supplementation with creatine may improve muscle wasting associated wit…	It has a role as a neuroprotective agent, a nutraceutical, a human metabolite and a mouse metabolite, skin conditioning, improve training resistance.		C4H9N3O2	131	-1.88	Yes	Yes	Yes	No	No	Yes	Yes
9-methylanthracene (779-02-2)		https://pubchem.ncbi.nlm.nih.gov/compound/13068	Soil.	Intermediates for pharmaceutical and chemical research.		C15H12	192	5.14	No	Yes	Yes	No	No	No	No
1-methyl-7-propan-2-ylphenanthrene (483-65-8)	7-Isopropyl-1-methylphenanthrene, 1-Methyl-7-isopropylphenanthrene, 1-Methyl-7-(1-methylethyl)phenanthrene, Methyl-1-isopropyl-7-phenanthrene	https://pubchem.ncbi.nlm.nih.gov/compound/10222	It is derived by degradation of specific diterpenoids biologically produced by conifer trees.	Food additive, hair cosmetics.		C18H18	234	6.48	No	Yes	No	No	No	Yes	No
5-methyl-6-phenylpyrazine-2,3-dicarbonitrile (52109-67-8)	2,3-Dicyano-5-methyl-6-phenylpyrazine, 5-methyl-6-phenylpyrazine-2,3-dicarbonitrile, 2,3-Dicyano-6-methyl-5-phenylpyrazine, 5-Methyl-6-phenyl-2,3-pyrazinedicarbonitrile	https://pubchem.ncbi.nlm.nih.gov/compound/142908	Plant compound.	Herbicide; charge transport material, compound, and organic light-emitting element.		C13H8N4	220	3.01	Yes	Yes	Yes	No	No	No	No
1,2-dichloro-4-ethylbenzene (6623-59-2)	3,4-Dichloroethylbenzene, 1,2-Dichloro-4-ethylbenzene	https://pubchem.ncbi.nlm.nih.gov/compound/244557	Plant compound.	To make plastics, resins, synthetic fibers, rubber lubricants, dyes, detergents, and pesticides.		C8H8Cl2	174	4.27	Yes	Yes	No	No	No	Yes	No
6,15-dimethyltricyclo[10.4.0.04,9]hexadeca-1(12),4(9),5,7,13,15-hexaene (69978-57-0)	1,2-methyl-5,6,7,12-tetrahydrodibenzocycloocten-6-one, 2,9-Dimethyl-5,6,11,12-tetrahydrodibenzo[a,e]cyclooctene, 2,9-Dimethyl-5,6,11,12-tetrahydrodibenzo[a,e][8]annulene	https://pubchem.ncbi.nlm.nih.gov/compound/4610239	Plant compound.	Inhibition of xenobiotic metabolism and mutagenicity (cancer therapy) in liver; antioxidant.		C18H20	236	6.83	No	Yes	No	No	No	Yes	No
2,3,5-trimethylphenanthrene (3674-73-5)		https://pubchem.ncbi.nlm.nih.gov/compound/19350	Present at high concentrations in PAH-contaminated surface soils, sediments, and waste sites.	Solvent and other industrial applications.		C17H16	220	6.06	No	Yes	No	No	No	Yes	No
1-(2-hydroxyphenyl)-3-phenylpropane-1,3-dione (1469-94-9)	o-Hydroxydibenzoylmethane, 1-(2-Hydroxyphenyl)-3-phenyl-1,3-propanedione, 1-(o-phenyl)-3-phenyl-1,3-propanedione, Benzoyl-(2-hydroxybenzoyl)methane, 2'-hydroxy-beta-oxodihydrochalcone	https://pubchem.ncbi.nlm.nih.gov/compound/73849	Plant metabolite.	Anti-inflammatory, anti-infective, antioxidant and anticancer.		C15H12O3	240	3.34	Yes	Yes	Yes	No	No	No	No
1,1-diphenylprop-1-ene-2-thiol (74630-83-4)	1,1-Diphenyl-1-propene-2-thiol	https://pubchem.ncbi.nlm.nih.gov/compound/614674	Plant metabolite.	Intermediate in the manufacture of other products.		C15H14S	226	6.19	No	Yes	No	No	No	No	No
2,5-dimethyl-4-oxidopyrazin-1-ium 1-oxide (6890-38-6)	Pyrazine 2,5-bis-(1,1 dimethyl)-1,4-dioxide, 2,5-Dimethylpyrazine 1,4-dioxide, 2,5-Dimethylpyrazine-1,4-dioxide, 2,5-Dimethylpyrazine-N,N'-dioxide	https://pubchem.ncbi.nlm.nih.gov/compound/587626	Plant compound.	Organic semiconductor material and organic semiconductor devices, adsorbent.		C6H8N2O2	140	-1.91	Yes	Yes	No	No	Yes	Yes	No
1-isothiocyanato-2-methylsulfanylbenzene (51333-75-6)	2-(Methylthio)phenyl isothiocyanate, 2-Methylthiobenzenisothiocyanate, 1-Isothiocyanato-2-(methylthio)benzene	https://pubchem.ncbi.nlm.nih.gov/compound/142840	Plant metabolite.	Although there has been some basic research on how isothiocyanates might exert biological effects in vivo, there is no high-quality evidence to date for its efficacy against human diseases,		C8H7NS2	181	3.96	Yes	Yes	No	No	No	No	No
benzo[f][1]benzothiole (268-77-9)	Naphtha[2,3-b]thiophene, Naphtho[2,3-b]thiophene, Benzo[f][1]benzothiole	https://pubchem.ncbi.nlm.nih.gov/compound/67497	Plant metabolite.	Antibiotic adjuvant.		C12H8S	184	5.61	No	Yes	Yes	No	No	No	No
4-methyldibenzothiophene (7372-88-5)	4-Methyldibenzo[b,d]thiophene, 6-Methyl-8-thiatricyclo[7.4.0.02,7]trideca-1(9),2(7),3,5,10,12-hexaene, 6-Methyl-8-thiatricyclo[7.4.0.02,7]trideca-1(13),2,4,6,9,11-hexaene	https://pubchem.ncbi.nlm.nih.gov/compound/30364	Plant metabolite.	Electronical applications.		C13H10S	198	4.84	Yes	Yes	Yes	No	No	No	No
(3S,3aS,5aS,9bS)-7-chloro-3,5a,9-trimethyl-3a,4,5,9b-tetrahydro-3H-benzo[g][1]benzofuran-2,8-dione (28136-94-9)	2-Chlorosantonin	https://pubchem.ncbi.nlm.nih.gov/compound/102117061	Plant compound.	Synthesis of chemicals.		C15H17ClO3	281	2.21	Yes	Yes	Yes	No	Yes	Yes	Yes
1-methyl-3,7-dihydropurine-2,6-dione (6136-37-4)	Methoxyxanthone, 1-Methylxanthine, 1-Methyl-1H-purine-2,6(3H,7H)-dione, 1-Methyl-7H-xanthine, 2,6-Dihydroxy-1-methylpurine, 1-Methyl-2,3,6,7-tetrahydro-1H-purine-2,6-dione, 1-Methyl-3,9-dihydropurine-2,6-dione, 1-Methyl-3,7-dihydro-1H-purine-2,6-dione, 1-Methyl-1H-purine-2,6-diol, 1-Methyl-1,3,7-trihydropurine-2,6-dione	https://pubchem.ncbi.nlm.nih.gov/compound/80220	Plant metabolite.	Treatment and prevention of vascular disorders (similar to caffeine), treating general inflammation and pain, food additive, treatment of active ankylosing spondylitis, nebulizer.		C6H6N4O2	166	-1.52	Yes	Yes	No	No	Yes	No	No
bicyclo[4.2.0]octa-1,3,5-triene (694-87-1)	Benzocyclobutene, Benzocyclobutane, 2-Dihydrobenzocyclobutene, 1,2-Dihydrocyclobutabenzene, Bicyclo[4.2.0]octa-1(6),2,4-triene	https://pubchem.ncbi.nlm.nih.gov/compound/69667	Plant compound.	Microelectronic and photonic applications.		C8H8	104	2.78	Yes	Yes	No	No	Yes	No	No
9-azatricyclo[10.4.0.02,7]hexadeca-1(16),2,4,6,12,14-hexaene (6196-54-9)	5,6,7,8-Tetrahydrodibenz[c,e]azocine	https://pubchem.ncbi.nlm.nih.gov/compound/22569	Plant compound.	Antibiotic and insecticide.		C15H15N	209	3.51	Yes	Yes	Yes	No	No	Yes	No
1,2,3,4,6,7,8,11,12,12b-decahydrobenzo[a]anthracene (16434-56-3)	1,2,3,4,6,7,8,11,12,12b-Decahydrobenz[a]anthracene	https://pubchem.ncbi.nlm.nih.gov/compound/71435413	Plant metabolite.	Anthracene is used to make the red dye alizarin as well as other dyes.		C18H22	238	5.85	No	No	No	No	No	Yes	No
Phenol (108-95-2)	Carbolic acid, Hydroxybenzene, Phenic acid, Oxybenzene, Phenylic acid, Benzenol, Monophenol, Phenyl hydrate, Phenylic alcohol, Phenyl hydroxide, Monohydroxybenzene, Phenol alcohol, Phenyl alcohol	https://pubchem.ncbi.nlm.nih.gov/compound/996	Plant metabolite (lignin and pigment biosynthesis) and Hazardous Air Pollutant (HAP).	It is used primarily in the production of phenolic resins and in the manufacture of nylon and other synthetic fibers. It is also used in slimicides (chemicals that kill bacteria and fungi in slimes), as a disinfectant and antiseptic, and in medicinal preparations such as mouthwash and sore throat lozenges, minor mouth irritation, and pain associated with canker sores; treatment of focal spasticit…		C6H6O	94	1.48	Yes	Yes	No	No	Yes	No	No
(E)-3-phenylprop-2-enoic acid (140-10-3)	Cinnamic acid, trans-cinnamic acid, (E)-Cinnamic acid, trans-3-Phenylacrylic acid, (2E)-3-Phenylprop-2-enoic acid, 3-Phenylacrylic acid, trans-Cinnamate, trans-beta-Carboxystyrene, 3-Phenyl-2-propenoic acid, (E)-cinnamate, Benzeneacrylic acid, trans-3-Phenyl-2-propenoic acid, Benzenepropenoic acid, Cinnamylic acid, t-Cinnamic acid, (E)-beta-Phenylacrylic acid, Phenylethylenecarboxylic acid, Benzy…	https://pubchem.ncbi.nlm.nih.gov/compound/444539	Plant metabolite.	Flavoring agent, inhibition of HDAC in human Hela cells nuclear extracts by fluorimetric assay (cancer treatment).		C9H8O2	148	2.41	Yes	Yes	No	No	Yes	No	No
butyl hexadecanoate (111-06-8)	n-Butyl palmitate, Hexadecanoic acid butyl ester, n-Butyl hexadecanoate, Palmitic acid butyl ester, Butyl palmitate	https://pubchem.ncbi.nlm.nih.gov/compound/8090	Butyl palmitate can be found in common grape, which makes butyl palmitate a potential biomarker for the consumption of this food product.	Flavoring agent, ceramide regulator, antifungal		C20H40O2	312	9.21	No	No	No	No	No	Yes	No
aACD/Labs 2020.1.0
bRule of Five: hydrogen bond donors (HBDs) ≤ 5, hydrogen bond acceptors (HBAs) ≤ 10, MW ≤ 500 Da, cLog P ≤ 5 (Lipinski, C. A.; Lombardo, F.; Dominy, B. W.; Feeney, P. J., Experimental and computational approaches to estimate solubility and permeability in drug discovery and development settings. Adv. Drug Deliv. Rev. 1997, 23, 3–25.)
cpolar surface area (PSA) ≤ 140 Å2, rotatable bonds (RBs) ≤ 10, HBDs + HBAs ≤ 12 (Veber, D. F.; Johnson, S. R.; Cheng, H. Y.; Smith, B. R.; Ward, K. W.; Kopple, K. D., Molecular Properties That Influence the Oral Bioavailability of Drug Candidates. J. Med. Chem. 2002, 45, 2615–2623.)
d-0.4 < cLog P < 5.6 , 160 < MW < 480, 40 < molar refractivity (MR) < 130, 20 < number of atoms < 70 (Ghose, A. K.; Viswanadhan, V. N.; Wendoloski, J. J. A., Knowledge-based approach in designing combinatorial or medicinal chemistry libraries for drug discovery. 1. A qualitative and quantitative characterization of known drug databases. J Comb. Chem. 1999, 1, 55–68)
eMACCS-II Drug Data Report (MDDR)-like rule: ring number (RN) ≥ 3, RBs ≥ 6, rigid bonds (RBs) ≥ 18 (Oprea, T. I., Property distribution of drug-related chemical databases. J. Comput. Aided Mol. Des. 2000, 14, 251–264)
fRule of Three: hydrogen bond donors (HBDs) ≤ 3, hydrogen bond acceptors (HBAs) ≤ 3, MW < 300 Da, cLog P ≤ 3 (Congreve, M.; Carr, R.; Murray, C.; Jhoti, H., A “rule of three” for fragment-based lead discovery? Drug Discov. Today 2003, 8, 876–877)
ffraction of sp3 hybridized carbon atoms (i. e., number of sp3 hybridized carbons/total carbon count) > 0.2 (Lovering, F.; Bikker, J.; Humblet, C., Escape from flatland: increasing saturation as an approach to improving clinical success. J. Med. Chem. 2009, 52, 6752–6756)
